# Supplementary material for: RECAP reveals the true statistical significance of ChIP-seq peak calls
Source: PubMed Central journal article supplement (PMC6761936; doi:10.1093/bioinformatics/btz150), 2019-03-01
Supplement: btz150_supplementary_information.pdf [file btz150_supplementary_information.pdf]

Supplementary information for:

## RECAP reveals the true statistical significance of ChIP-seq peak calls

Justin G. Chitpin, Aseel Awdeh, Theodore J. Perkins

Table S1: ENCODE identifiers for ChIP-seq replicate datasets

| Replicate 1 | Replicate 2 | Lab            | Transcription Factor | Cell Line                   |
|-------------|-------------|----------------|----------------------|-----------------------------|
| ENCFF263MBV | ENCFF860IRS | Michael Snyder | TARDBP               | <i>Homo sapiens</i> K562    |
| ENCFF141XAC | ENCFF995IZW | Michael Snyder | SKIL                 | <i>Homo sapiens</i> K562    |
| ENCFF487SUP | ENCFF758LME | Michael Snyder | SP1                  | <i>Homo sapiens</i> K562    |
| ENCFF254IUH | ENCFF167NVK | Michael Snyder | MTA2                 | <i>Homo sapiens</i> K562    |
| ENCFF294UTM | ENCFF387BDW | Michael Snyder | SMARCE1              | <i>Homo sapiens</i> K562    |
| ENCFF619XNM | ENCFF518PQY | Michael Snyder | ATF7                 | <i>Homo sapiens</i> K562    |
| ENCFF024NZQ | ENCFF168TBA | Michael Snyder | RAD51                | <i>Homo sapiens</i> K562    |
| ENCFF682OCC | ENCFF639CLN | Michael Snyder | MIER1                | <i>Homo sapiens</i> K562    |
| ENCFF149LTH | ENCFF873BRB | Michael Snyder | ZBTB40               | <i>Homo sapiens</i> K562    |
| ENCFF717OYW | ENCFF500YYZ | Michael Snyder | ZEB2                 | <i>Homo sapiens</i> K562    |
| ENCFF073MBT | ENCFF280ZFT | Tim Reddy      | CEBPB                | <i>Homo sapiens</i> A549    |
| ENCFF074CYV | ENCFF864XTU | Tim Reddy      | EP300                | <i>Homo sapiens</i> A549    |
| ENCFF796UCB | ENCFF098QVB | Tim Reddy      | BCL3                 | <i>Homo sapiens</i> A549    |
| ENCFF179XAQ | ENCFF330XFU | Tim Reddy      | JUNB                 | <i>Homo sapiens</i> A549    |
| ENCFF217RBI | ENCFF791DRP | Tim Reddy      | CEBPB                | <i>Homo sapiens</i> A549    |
| ENCFF347MNU | ENCFF417GPF | Tim Reddy      | CEBPB                | <i>Homo sapiens</i> A549    |
| ENCFF599JTK | ENCFF389OFH | Tim Reddy      | JUNB                 | <i>Homo sapiens</i> A549    |
| ENCFF476XBN | ENCFF761UEZ | Tim Reddy      | JUN                  | <i>Homo sapiens</i> A549    |
| ENCFF504YVD | ENCFF595EIS | Tim Reddy      | HES2                 | <i>Homo sapiens</i> A549    |
| ENCFF181HLP | ENCFF870WJP | Tim Reddy      | NR3C1                | <i>Homo sapiens</i> A549    |
| ENCFF575GRT | ENCFF177XDM | Richard Myers  | TAF1                 | <i>Homo sapiens</i> GM12878 |
| ENCFF725DLZ | ENCFF238NNG | Richard Myers  | EP300                | <i>Homo sapiens</i> GM12878 |
| ENCFF399QIP | ENCFF802IZN | Richard Myers  | BATF                 | <i>Homo sapiens</i> GM12878 |
| ENCFF579PRC | ENCFF884LEJ | Richard Myers  | RUNX3                | <i>Homo sapiens</i> GM12878 |
| ENCFF791EPM | ENCFF845MYC | Richard Myers  | PBX3                 | <i>Homo sapiens</i> GM12878 |
| ENCFF963FTZ | ENCFF179SRP | Richard Myers  | TARDBP               | <i>Homo sapiens</i> GM12878 |
| ENCFF240MQI | ENCFF888PAI | Richard Myers  | IRF4                 | <i>Homo sapiens</i> GM12878 |
| ENCFF894EID | ENCFF569QEN | Richard Myers  | REST                 | <i>Homo sapiens</i> GM12878 |
| ENCFF207QTV | ENCFF983YCI | Richard Myers  | NFATC1               | <i>Homo sapiens</i> GM12878 |
| ENCFF731ZNW | ENCFF263NOT | Richard Myers  | SRF                  | <i>Homo sapiens</i> GM12878 |

| Replicate 1 | Replicate 2 | Lab           | Transcription Factor | Cell Line                   |
|-------------|-------------|---------------|----------------------|-----------------------------|
| ENCFF013XEG | ENCFF040PMB | Xiang-Dong Fu | TARDBP               | <i>Homo sapiens</i> HepG2   |
| ENCFF247KKW | ENCFF046IYE | Xiang-Dong Fu | SNRNP70              | <i>Homo sapiens</i> HepG2   |
| ENCFF490QZJ | ENCFF774URE | Xiang-Dong Fu | SRSF9                | <i>Homo sapiens</i> HepG2   |
| ENCFF641AUO | ENCFF883UWI | Xiang-Dong Fu | U2AF2                | <i>Homo sapiens</i> HepG2   |
| ENCFF033GIO | ENCFF739WOA | Xiang-Dong Fu | RBFOX2               | <i>Homo sapiens</i> HepG2   |
| ENCFF146SND | ENCFF560SVR | Xiang-Dong Fu | HNRNPL               | <i>Homo sapiens</i> HepG2   |
| ENCFF267HPS | ENCFF824EFD | Xiang-Dong Fu | AGO1                 | <i>Homo sapiens</i> HepG2   |
| ENCFF728YOO | ENCFF542MVV | Xiang-Dong Fu | PRPF4                | <i>Homo sapiens</i> HepG2   |
| ENCFF707ALH | ENCFF954VXM | Xiang-Dong Fu | FIP1L1               | <i>Homo sapiens</i> HepG2   |
| ENCFF178TOV | ENCFF479DBP | Xiang-Dong Fu | PCBP2                | <i>Homo sapiens</i> HepG2   |
| ENCFF001IIN | ENCFF094XRA | Barbara Wold  | USF1                 | <i>Homo sapiens</i> Myocyte |
| ENCFF001IIK | ENCFF302FXR | Barbara Wold  | TCF3                 | <i>Homo sapiens</i> Myocyte |
| ENCFF001IHL | ENCFF770ANH | Barbara Wold  | MYOD1                | <i>Homo sapiens</i> Myocyte |
| ENCFF001IFF | ENCFF147NVK | Barbara Wold  | MAX                  | <i>Homo sapiens</i> Myocyte |
| ENCFF001IIB | ENCFF380GQR | Barbara Wold  | SRF                  | <i>Homo sapiens</i> Myocyte |
| ENCFF001IDK | ENCFF586VMG | Barbara Wold  | E2F4                 | <i>Homo sapiens</i> Myocyte |
| ENCFF001IHG | ENCFF204AZL | Barbara Wold  | MYOD1                | <i>Homo sapiens</i> Myocyte |
| ENCFF001IIE | ENCFF727WYC | Barbara Wold  | TCF12                | <i>Homo sapiens</i> Myocyte |
| ENCFF001IFQ | ENCFF570IDO | Barbara Wold  | REST                 | <i>Homo sapiens</i> Myocyte |
| ENCFF001IGZ | ENCFF259LKI | Barbara Wold  | MYOG                 | <i>Homo sapiens</i> Myocyte |

Table S2: ENCODE identifiers for ChIP-seq datasets and their controls

| ChIP-seq    | Control     | Lab            | Transcription Factor | Cell Line                |
|-------------|-------------|----------------|----------------------|--------------------------|
| ENCFF263MBV | ENCFF227IZS | Michael Snyder | TARDBP               | <i>Homo sapiens</i> K562 |
| ENCFF860IRS | ENCFF910IKB | Michael Snyder | TARDBP               | <i>Homo sapiens</i> K562 |
| ENCFF141XAC | ENCFF227IZS | Michael Snyder | SKIL                 | <i>Homo sapiens</i> K562 |
| ENCFF995IZW | ENCFF910IKB | Michael Snyder | SKIL                 | <i>Homo sapiens</i> K562 |
| ENCFF487SUP | ENCFF910IKB | Michael Snyder | SP1                  | <i>Homo sapiens</i> K562 |
| ENCFF758LME | ENCFF227IZS | Michael Snyder | SP1                  | <i>Homo sapiens</i> K562 |
| ENCFF254IUH | ENCFF227IZS | Michael Snyder | MTA2                 | <i>Homo sapiens</i> K562 |
| ENCFF167NVK | ENCFF910IKB | Michael Snyder | MTA2                 | <i>Homo sapiens</i> K562 |
| ENCFF294UTM | ENCFF227IZS | Michael Snyder | SMARCE1              | <i>Homo sapiens</i> K562 |
| ENCFF387BDW | ENCFF910IKB | Michael Snyder | SMARCE1              | <i>Homo sapiens</i> K562 |
| ENCFF619XNM | ENCFF910IKB | Michael Snyder | ATF7                 | <i>Homo sapiens</i> K562 |
| ENCFF518PQY | ENCFF227IZS | Michael Snyder | ATF7                 | <i>Homo sapiens</i> K562 |
| ENCFF024NZQ | ENCFF910IKB | Michael Snyder | RAD51                | <i>Homo sapiens</i> K562 |
| ENCFF168TBA | ENCFF227IZS | Michael Snyder | RAD51                | <i>Homo sapiens</i> K562 |
| ENCFF682OCC | ENCFF227IZS | Michael Snyder | MIER1                | <i>Homo sapiens</i> K562 |
| ENCFF639CLN | ENCFF910IKB | Michael Snyder | MIER1                | <i>Homo sapiens</i> K562 |
| ENCFF149LTH | ENCFF910IKB | Michael Snyder | ZBTB40               | <i>Homo sapiens</i> K562 |
| ENCFF873BRB | ENCFF227IZS | Michael Snyder | ZBTB40               | <i>Homo sapiens</i> K562 |
| ENCFF717OYW | ENCFF910IKB | Michael Snyder | ZEB2                 | <i>Homo sapiens</i> K562 |
| ENCFF500YYZ | ENCFF227IZS | Michael Snyder | ZEB2                 | <i>Homo sapiens</i> K562 |
| ENCFF073MBT | ENCFF214UMU | Tim Reddy      | CEBPB                | <i>Homo sapiens</i> A549 |
| ENCFF280ZFT | ENCFF773DUX | Tim Reddy      | CEBPB                | <i>Homo sapiens</i> A549 |
| ENCFF074CYV | ENCFF271MPT | Tim Reddy      | EP300                | <i>Homo sapiens</i> A549 |
| ENCFF864XTU | ENCFF403EBP | Tim Reddy      | EP300                | <i>Homo sapiens</i> A549 |
| ENCFF796UCB | ENCFF503AJR | Tim Reddy      | BCL3                 | <i>Homo sapiens</i> A549 |
| ENCFF098QVB | ENCFF831MPX | Tim Reddy      | BCL3                 | <i>Homo sapiens</i> A549 |
| ENCFF179XAQ | ENCFF171YYX | Tim Reddy      | JUNB                 | <i>Homo sapiens</i> A549 |
| ENCFF330XFU | ENCFF631DES | Tim Reddy      | JUNB                 | <i>Homo sapiens</i> A549 |
| ENCFF217RBI | ENCFF634ULC | Tim Reddy      | CEBPB                | <i>Homo sapiens</i> A549 |
| ENCFF791DRP | ENCFF632UPH | Tim Reddy      | CEBPB                | <i>Homo sapiens</i> A549 |
| ENCFF347MNU | ENCFF455UAB | Tim Reddy      | CEBPB                | <i>Homo sapiens</i> A549 |
| ENCFF417GPF | ENCFF081TBO | Tim Reddy      | CEBPB                | <i>Homo sapiens</i> A549 |
| ENCFF599JTK | ENCFF653HKQ | Tim Reddy      | JUNB                 | <i>Homo sapiens</i> A549 |
| ENCFF389OFH | ENCFF097CSC | Tim Reddy      | JUNB                 | <i>Homo sapiens</i> A549 |
| ENCFF476XBN | ENCFF193ABY | Tim Reddy      | JUN                  | <i>Homo sapiens</i> A549 |
| ENCFF761UEZ | ENCFF222ACA | Tim Reddy      | JUN                  | <i>Homo sapiens</i> A549 |
| ENCFF504YVD | ENCFF368OTV | Tim Reddy      | HES2                 | <i>Homo sapiens</i> A549 |
| ENCFF595EIS | ENCFF634ULC | Tim Reddy      | HES2                 | <i>Homo sapiens</i> A549 |
| ENCFF181HLP | ENCFF813FWF | Tim Reddy      | NR3C1                | <i>Homo sapiens</i> A549 |
| ENCFF870WJP | ENCFF159VBZ | Tim Reddy      | NR3C1                | <i>Homo sapiens</i> A549 |

| ChIP-seq    | Control     | Lab           | Transcription Factor | Cell Line                   |
|-------------|-------------|---------------|----------------------|-----------------------------|
| ENCFF575GRT | ENCFF562HPN | Richard Myers | TAF1                 | <i>Homo sapiens</i> GM12878 |
| ENCFF177XDM | ENCFF100EIH | Richard Myers | TAF1                 | <i>Homo sapiens</i> GM12878 |
| ENCFF725DLZ | ENCFF438FFV | Richard Myers | EP300                | <i>Homo sapiens</i> GM12878 |
| ENCFF238NNG | ENCFF562HPN | Richard Myers | EP300                | <i>Homo sapiens</i> GM12878 |
| ENCFF399QIP | ENCFF100EIH | Richard Myers | BATF                 | <i>Homo sapiens</i> GM12878 |
| ENCFF802IZN | ENCFF438FFV | Richard Myers | BATF                 | <i>Homo sapiens</i> GM12878 |
| ENCFF579PRC | ENCFF754WTG | Richard Myers | RUNX3                | <i>Homo sapiens</i> GM12878 |
| ENCFF884LEJ | ENCFF966AVZ | Richard Myers | RUNX3                | <i>Homo sapiens</i> GM12878 |
| ENCFF791EPM | ENCFF562HPN | Richard Myers | PBX3                 | <i>Homo sapiens</i> GM12878 |
| ENCFF845MYC | ENCFF100EIH | Richard Myers | PBX3                 | <i>Homo sapiens</i> GM12878 |
| ENCFF963FTZ | ENCFF423BBH | Richard Myers | TARDBP               | <i>Homo sapiens</i> GM12878 |
| ENCFF179SRP | ENCFF747NOF | Richard Myers | TARDBP               | <i>Homo sapiens</i> GM12878 |
| ENCFF240MQI | ENCFF100EIH | Richard Myers | IRF4                 | <i>Homo sapiens</i> GM12878 |
| ENCFF888PAI | ENCFF438FFV | Richard Myers | IRF4                 | <i>Homo sapiens</i> GM12878 |
| ENCFF894EID | ENCFF430ZCF | Richard Myers | REST                 | <i>Homo sapiens</i> GM12878 |
| ENCFF569QEN | ENCFF100EIH | Richard Myers | REST                 | <i>Homo sapiens</i> GM12878 |
| ENCFF207QTV | ENCFF754WTG | Richard Myers | NFATC1               | <i>Homo sapiens</i> GM12878 |
| ENCFF983YCI | ENCFF966AVZ | Richard Myers | NFATC1               | <i>Homo sapiens</i> GM12878 |
| ENCFF731ZNW | ENCFF862QZT | Richard Myers | SRF                  | <i>Homo sapiens</i> GM12878 |
| ENCFF263NOT | ENCFF289ONG | Richard Myers | SRF                  | <i>Homo sapiens</i> GM12878 |
| ENCFF013XEG | ENCFF060VZM | Xiang-Dong Fu | TARDBP               | <i>Homo sapiens</i> HepG2   |
| ENCFF040PMB | ENCFF809MGU | Xiang-Dong Fu | TARDBP               | <i>Homo sapiens</i> HepG2   |
| ENCFF247KKW | ENCFF253UKR | Xiang-Dong Fu | SNRNP70              | <i>Homo sapiens</i> HepG2   |
| ENCFF046IYE | ENCFF279QEN | Xiang-Dong Fu | SNRNP70              | <i>Homo sapiens</i> HepG2   |
| ENCFF490QZJ | ENCFF629YZR | Xiang-Dong Fu | SRSF9                | <i>Homo sapiens</i> HepG2   |
| ENCFF774URE | ENCFF563YRA | Xiang-Dong Fu | SRSF9                | <i>Homo sapiens</i> HepG2   |
| ENCFF641AUO | ENCFF253UKR | Xiang-Dong Fu | U2AF2                | <i>Homo sapiens</i> HepG2   |
| ENCFF883UWI | ENCFF279QEN | Xiang-Dong Fu | U2AF2                | <i>Homo sapiens</i> HepG2   |
| ENCFF033GIO | ENCFF874GUL | Xiang-Dong Fu | RBFOX2               | <i>Homo sapiens</i> HepG2   |
| ENCFF739WOA | ENCFF719EDQ | Xiang-Dong Fu | RBFOX2               | <i>Homo sapiens</i> HepG2   |
| ENCFF146SND | ENCFF253UKR | Xiang-Dong Fu | HNRNPL               | <i>Homo sapiens</i> HepG2   |
| ENCFF560SVR | ENCFF279QEN | Xiang-Dong Fu | HNRNPL               | <i>Homo sapiens</i> HepG2   |
| ENCFF267HPS | ENCFF874GUL | Xiang-Dong Fu | AGO1                 | <i>Homo sapiens</i> HepG2   |
| ENCFF824EFD | ENCFF719EDQ | Xiang-Dong Fu | AGO1                 | <i>Homo sapiens</i> HepG2   |
| ENCFF728YOO | ENCFF450GNQ | Xiang-Dong Fu | PRPF4                | <i>Homo sapiens</i> HepG2   |
| ENCFF542MVV | ENCFF901YVZ | Xiang-Dong Fu | PRPF4                | <i>Homo sapiens</i> HepG2   |
| ENCFF707ALH | ENCFF707WXP | Xiang-Dong Fu | FIP1L1               | <i>Homo sapiens</i> HepG2   |
| ENCFF954VXM | ENCFF322OEH | Xiang-Dong Fu | FIP1L1               | <i>Homo sapiens</i> HepG2   |
| ENCFF178TOV | ENCFF450GNQ | Xiang-Dong Fu | PCBP2                | <i>Homo sapiens</i> HepG2   |
| ENCFF479DBP | ENCFF901YVZ | Xiang-Dong Fu | PCBP2                | <i>Homo sapiens</i> HepG2   |



| ChIP-seq    | Control     | Lab          | Transcription Factor | Cell Line                   |
|-------------|-------------|--------------|----------------------|-----------------------------|
| ENCFF001IIN | ENCFF001IER | Barbara Wold | USF1                 | <i>Homo sapiens</i> Myocyte |
| ENCFF094XRA | ENCFF001IES | Barbara Wold | USF1                 | <i>Homo sapiens</i> Myocyte |
| ENCFF001IIK | ENCFF001IEN | Barbara Wold | TCF3                 | <i>Homo sapiens</i> Myocyte |
| ENCFF302FXR | ENCFF258NUS | Barbara Wold | TCF3                 | <i>Homo sapiens</i> Myocyte |
| ENCFF001IHL | ENCFF001IEN | Barbara Wold | MYOD1                | <i>Homo sapiens</i> Myocyte |
| ENCFF770ANH | ENCFF258NUS | Barbara Wold | MYOD1                | <i>Homo sapiens</i> Myocyte |
| ENCFF001IFF | ENCFF993HAY | Barbara Wold | MAX                  | <i>Homo sapiens</i> Myocyte |
| ENCFF147NVK | ENCFF290FPB | Barbara Wold | MAX                  | <i>Homo sapiens</i> Myocyte |
| ENCFF001IIB | ENCFF001IDR | Barbara Wold | SRF                  | <i>Homo sapiens</i> Myocyte |
| ENCFF380GQR | ENCFF122QLV | Barbara Wold | SRF                  | <i>Homo sapiens</i> Myocyte |
| ENCFF001IDK | ENCFF001IER | Barbara Wold | E2F4                 | <i>Homo sapiens</i> Myocyte |
| ENCFF586VMG | ENCFF993HAY | Barbara Wold | E2F4                 | <i>Homo sapiens</i> Myocyte |
| ENCFF001IHG | ENCFF001IDR | Barbara Wold | MYOD1                | <i>Homo sapiens</i> Myocyte |
| ENCFF204AZL | ENCFF122QLV | Barbara Wold | MYOD1                | <i>Homo sapiens</i> Myocyte |
| ENCFF001IIE | ENCFF001IES | Barbara Wold | TCF12                | <i>Homo sapiens</i> Myocyte |
| ENCFF727WYC | ENCFF290FPB | Barbara Wold | TCF12                | <i>Homo sapiens</i> Myocyte |
| ENCFF001IFQ | ENCFF001IEN | Barbara Wold | REST                 | <i>Homo sapiens</i> Myocyte |
| ENCFF570IDO | ENCFF258NUS | Barbara Wold | REST                 | <i>Homo sapiens</i> Myocyte |
| ENCFF001IGZ | ENCFF993HAY | Barbara Wold | MYOG                 | <i>Homo sapiens</i> Myocyte |
| ENCFF259LKI | ENCFF290FPB | Barbara Wold | MYOG                 | <i>Homo sapiens</i> Myocyte |

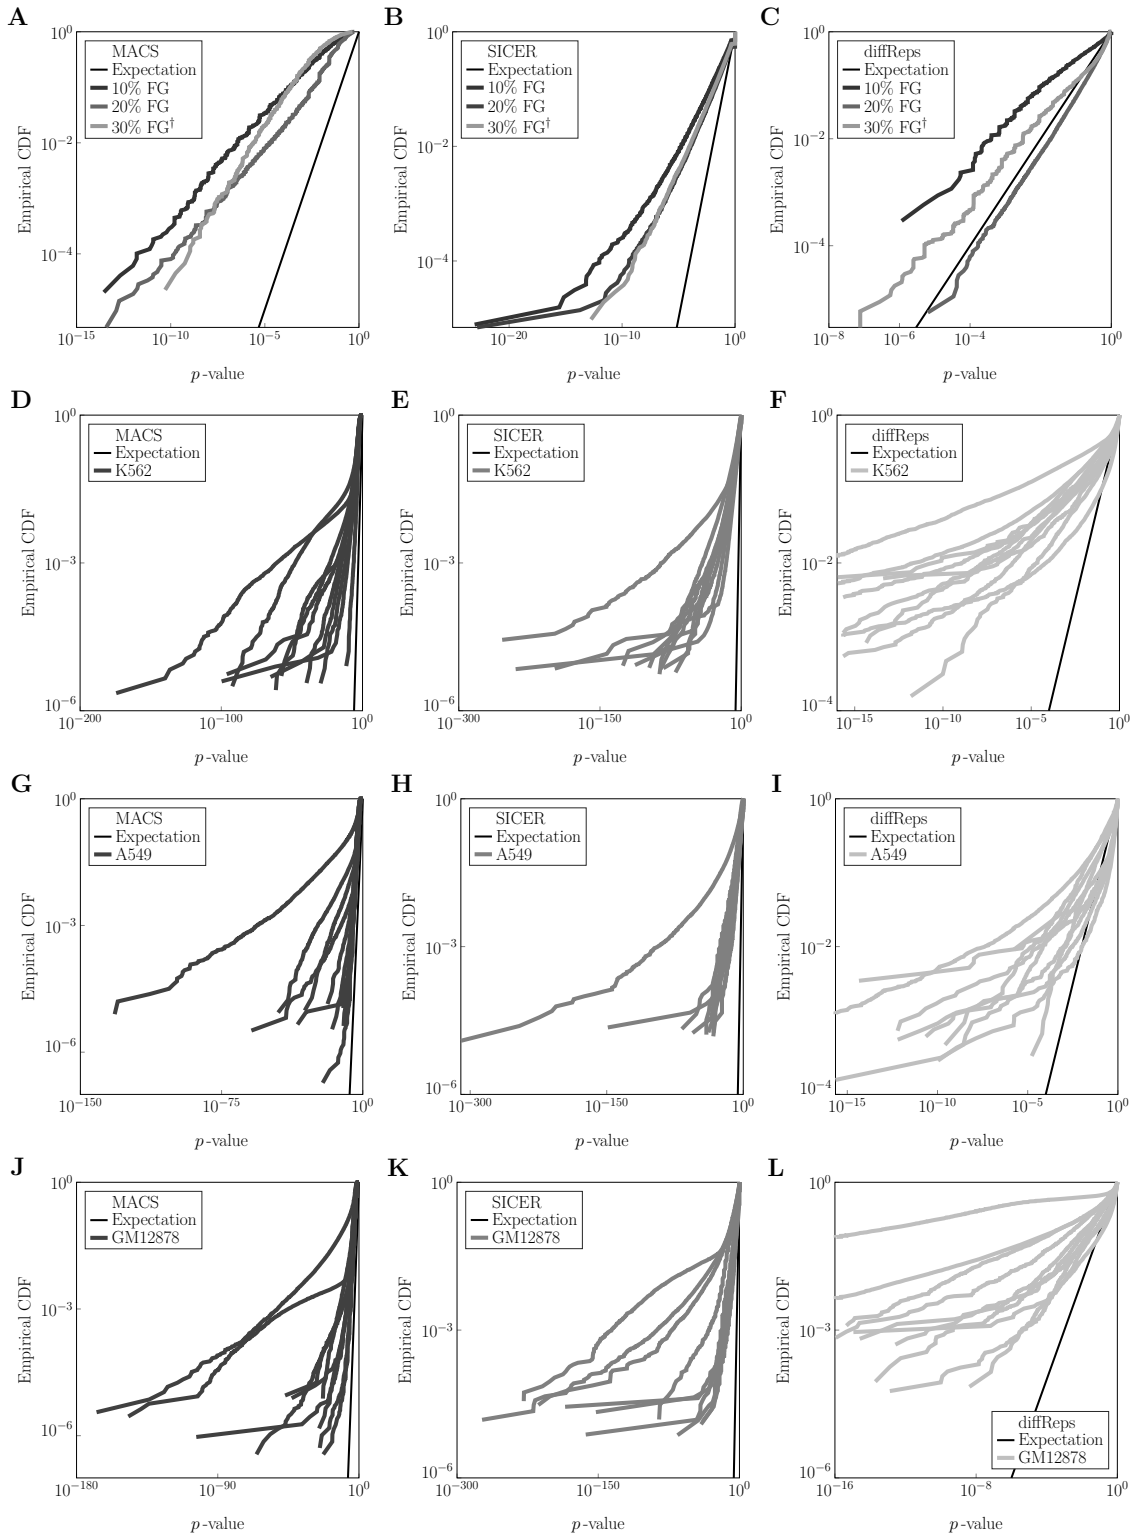

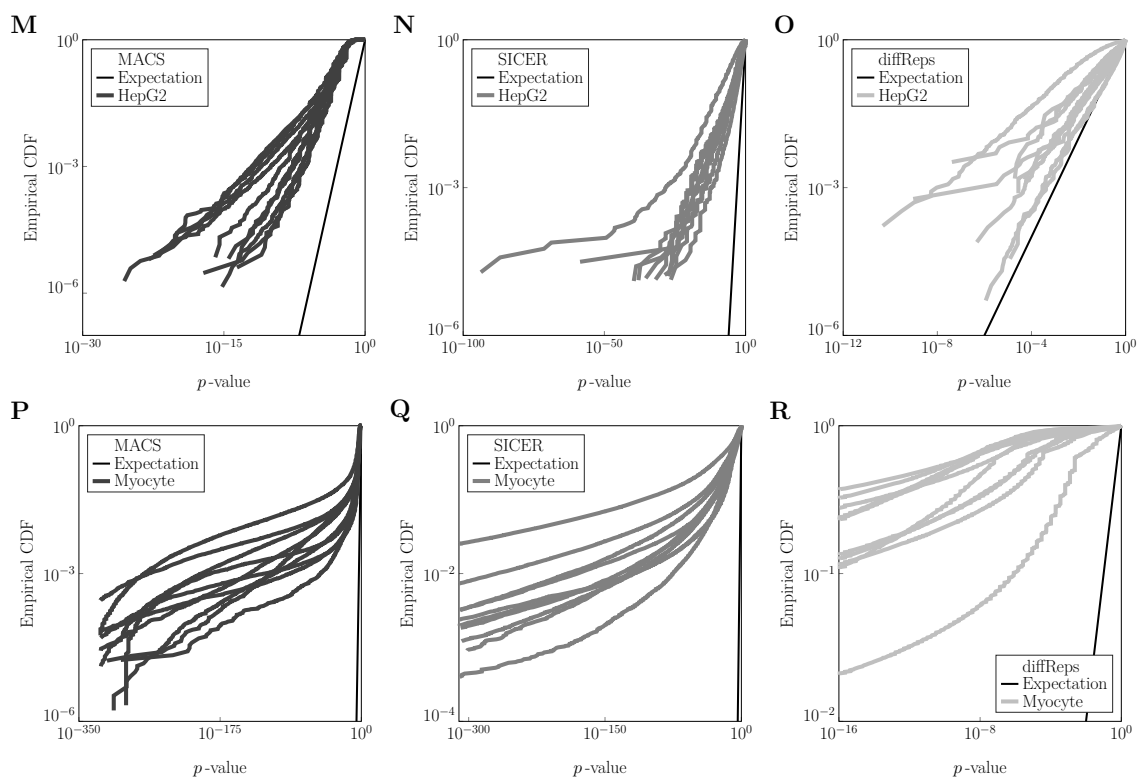

Figure S1: Empirical CDF for peak raw p-values for MACS (A), SICER (B), and diffReps (C) when applied to different types of simulated null hypothesis data: 500bp peaks with 10% of total reads, 500bp peaks with 20% of total reads, and 4kbp peaks with 30% of total reads. Empirical CDFs for peak raw p-values for MACS (D, G, J, M, P), SICER (E, H, K, N, Q), and diffReps (F, I, L, O, R) when applied to ENCODE data, where one ChIP-seq replicate is used as control for another ChIP-seq replicate.

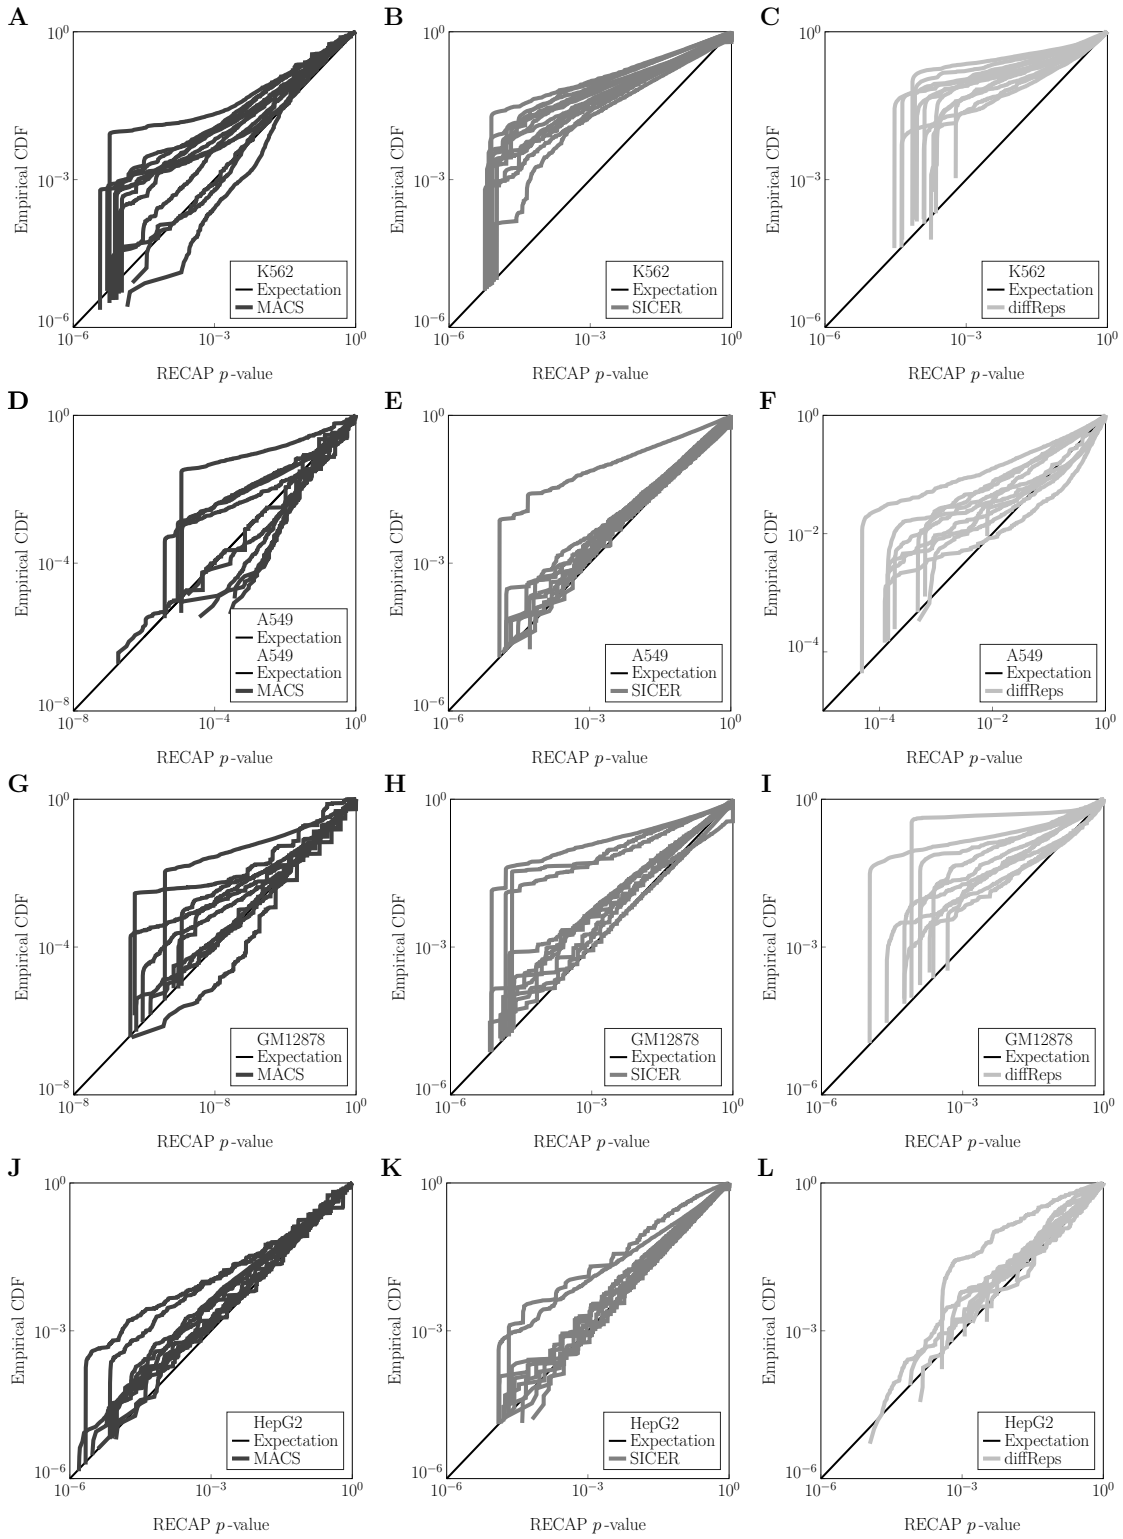

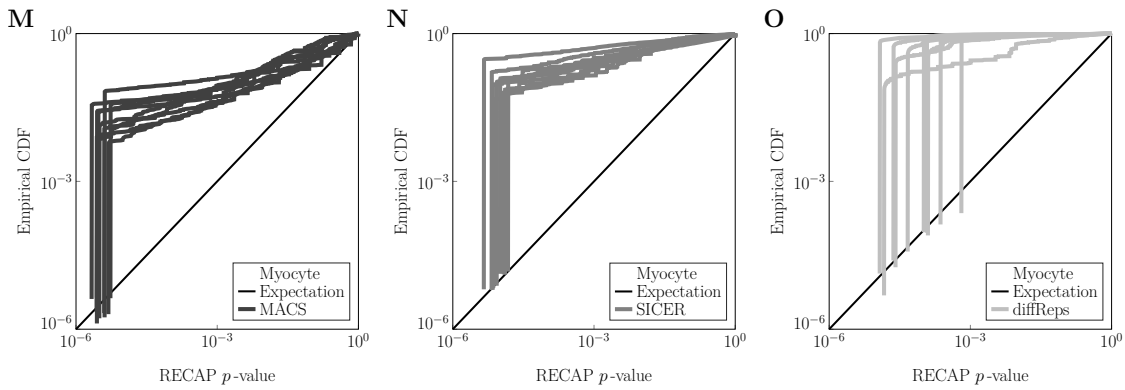

Figure S2: Empirical CDFs for peak recalibrated p-values for MACS (A, D, G, J, M), SICER (B, E, H, K, N) and diffReps (C, F, I, L, O) when applied to 10 replicate pairs of ENCODE ChIP-seq data.

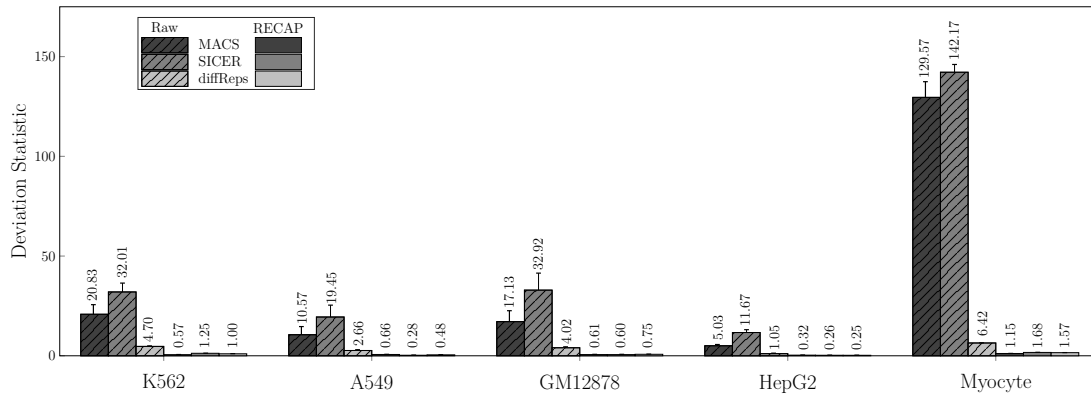

Figure S3: Reductions in deviation statistic for the RECAP recalibrated p-values for 10 replicate pairs of datasets within 5 cell lines.

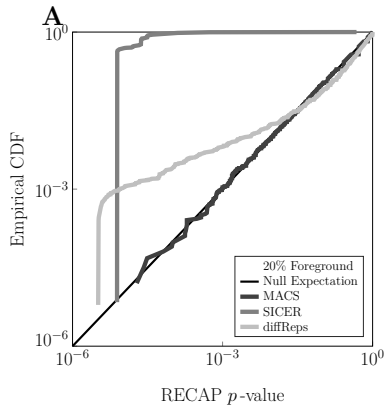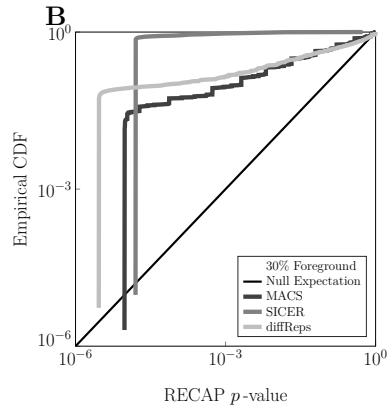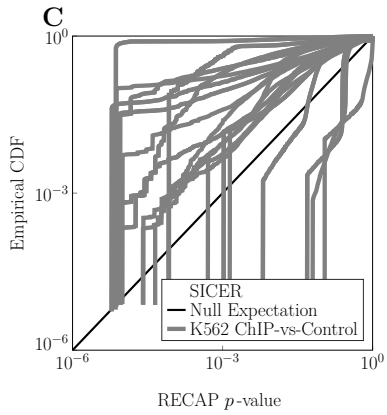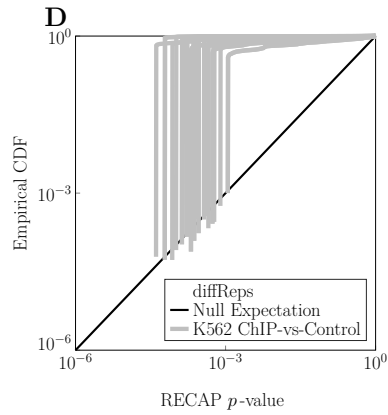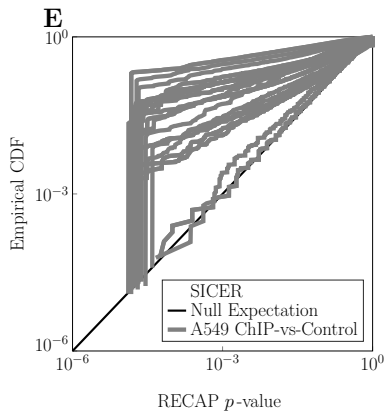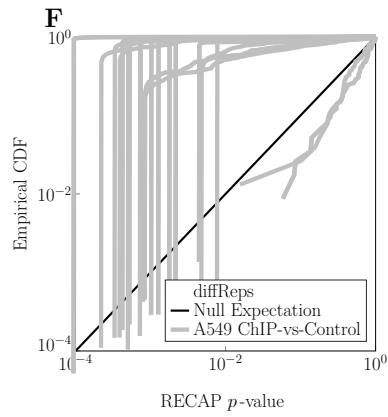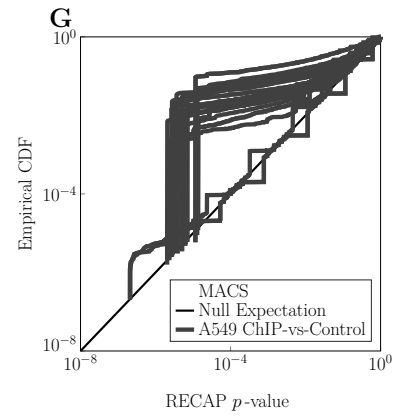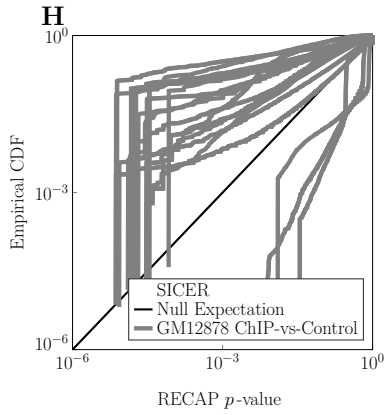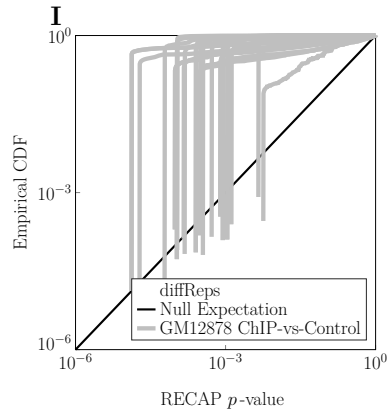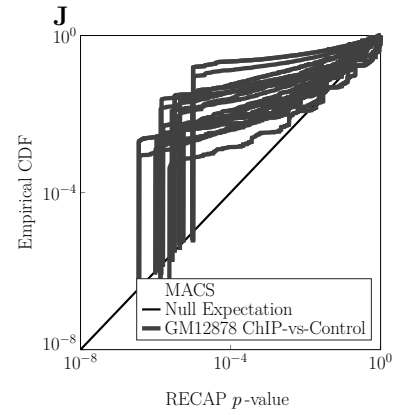

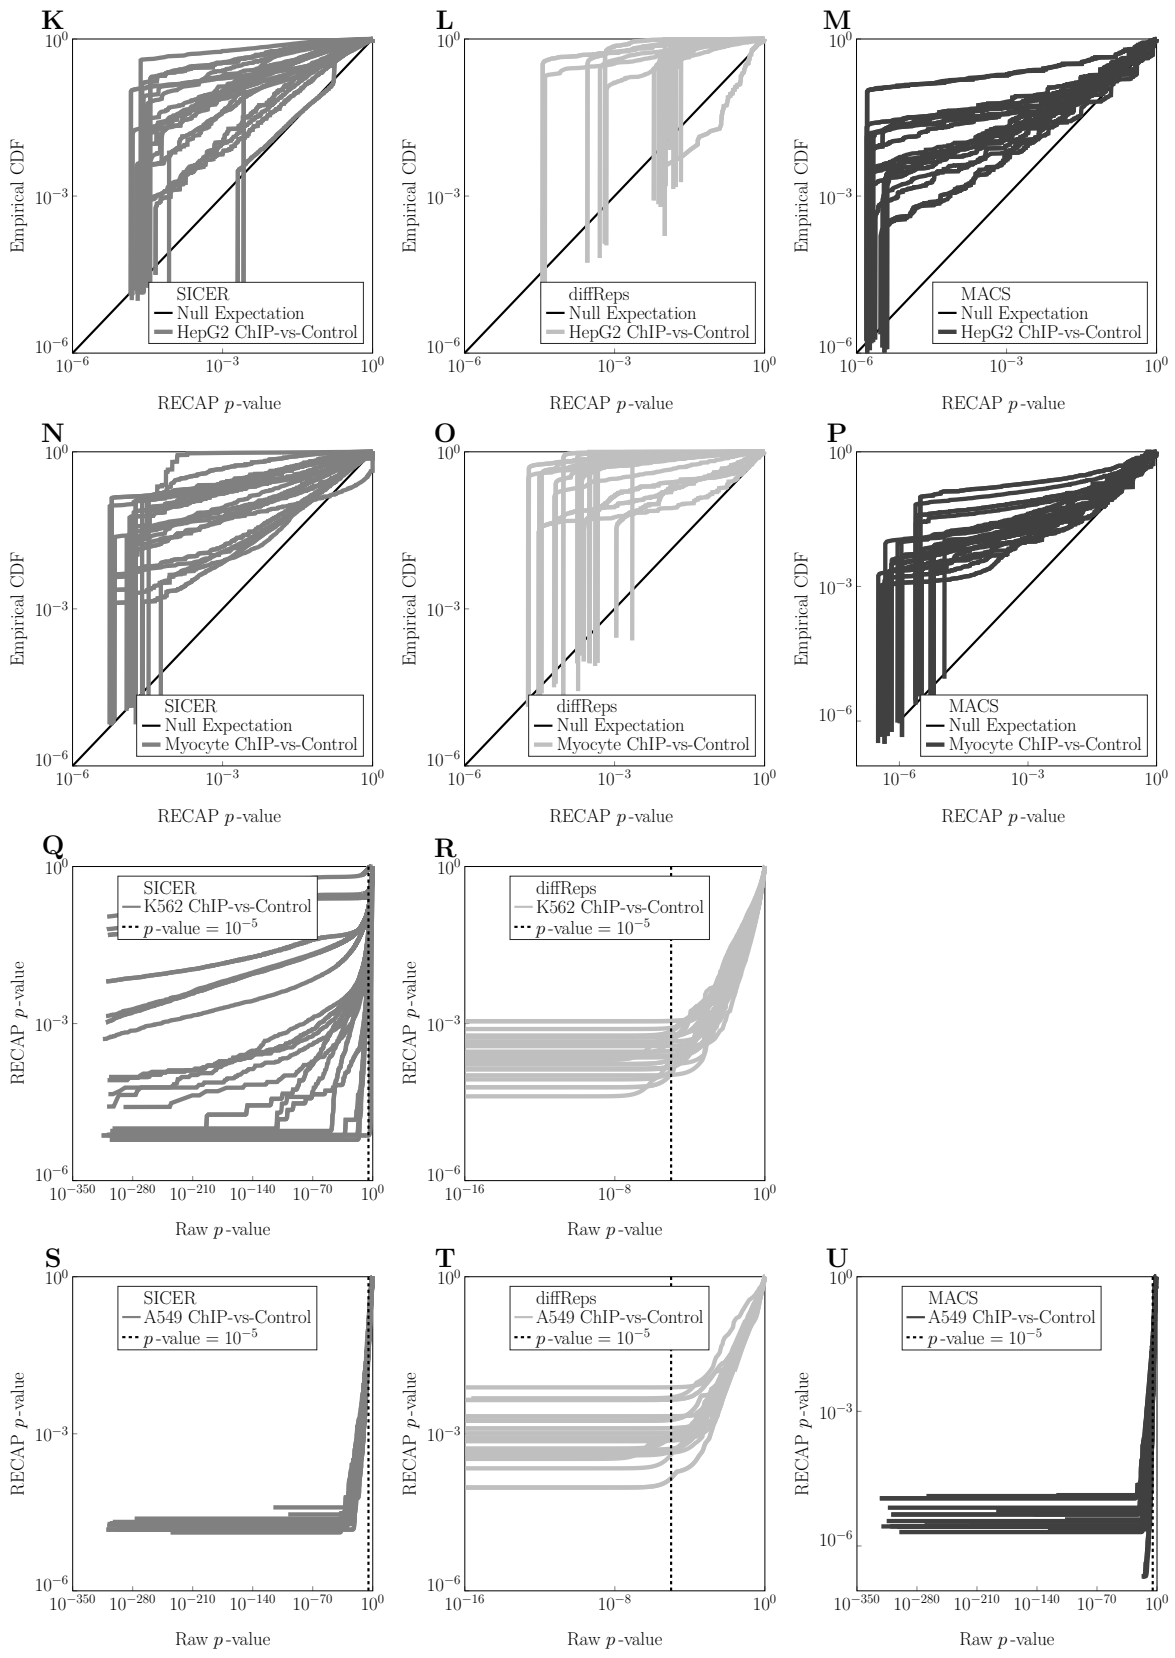

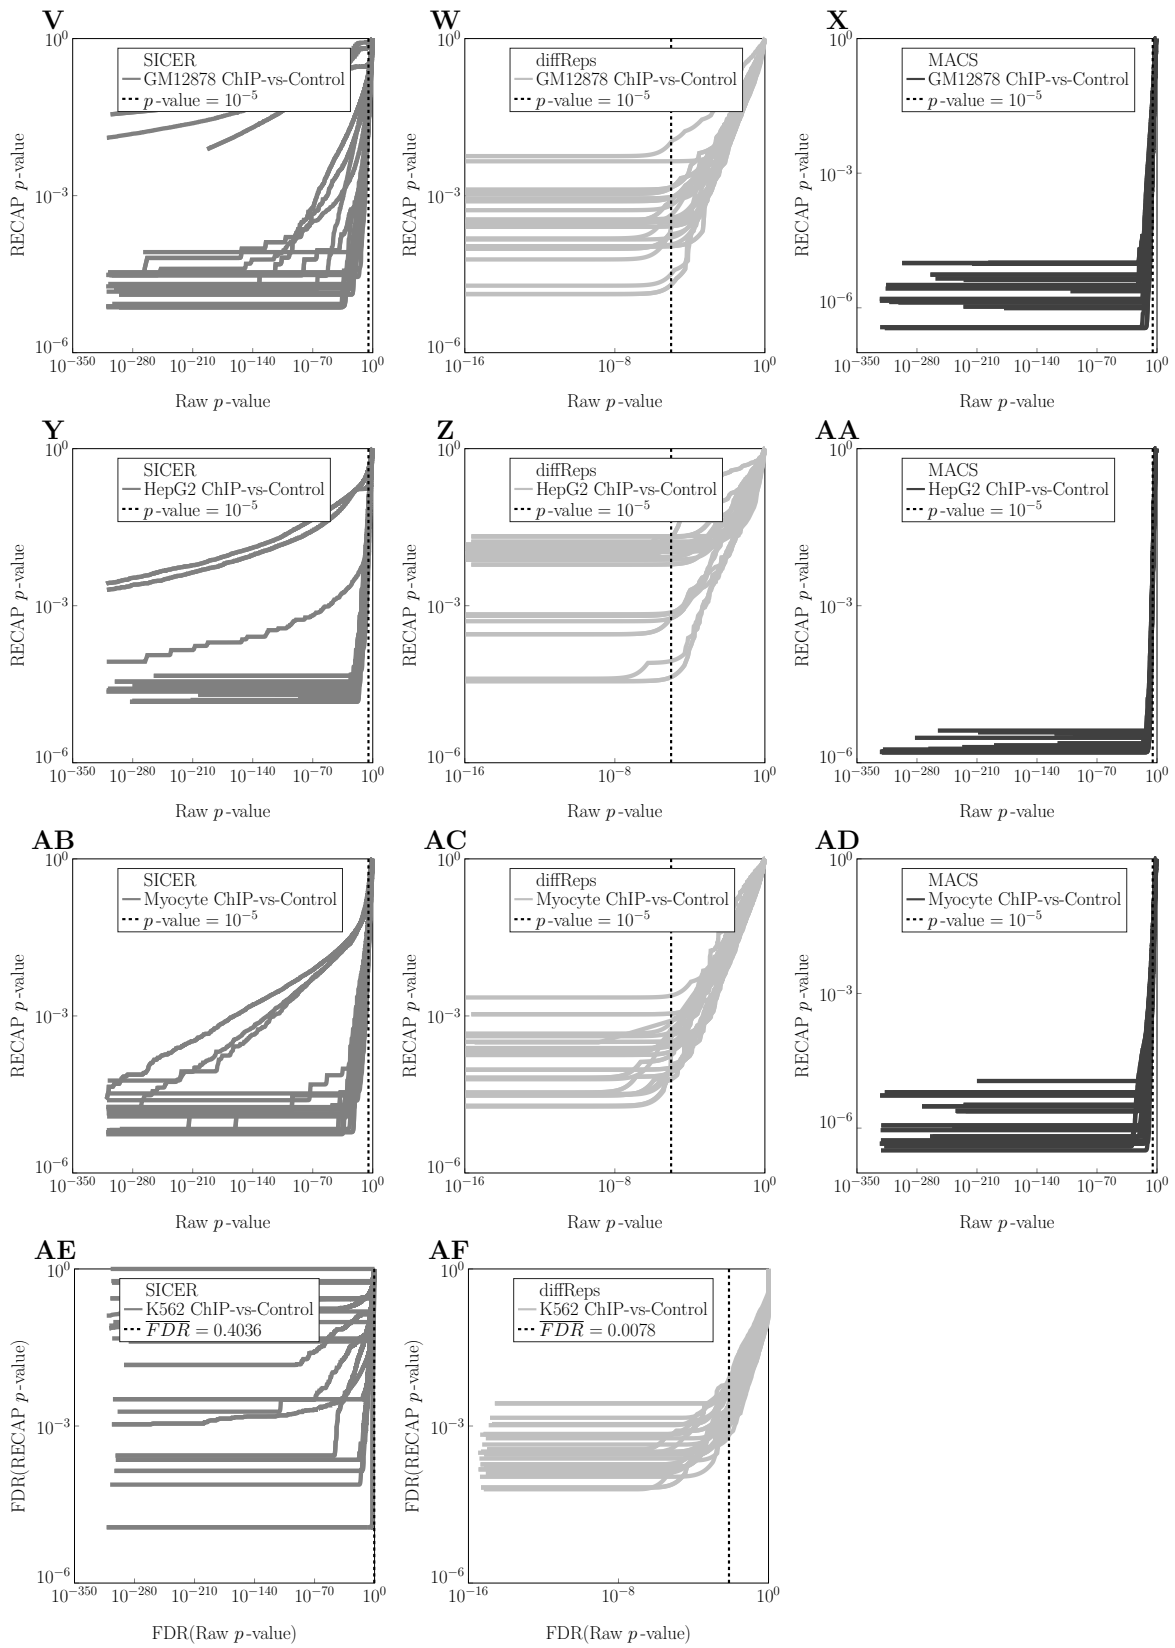



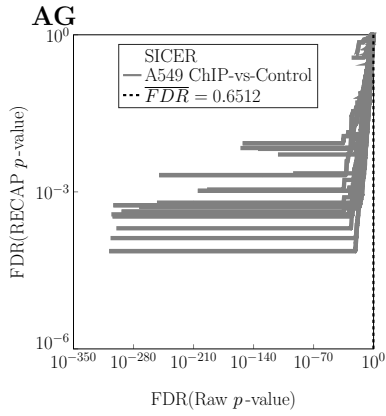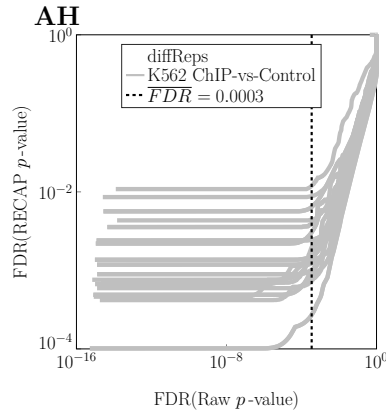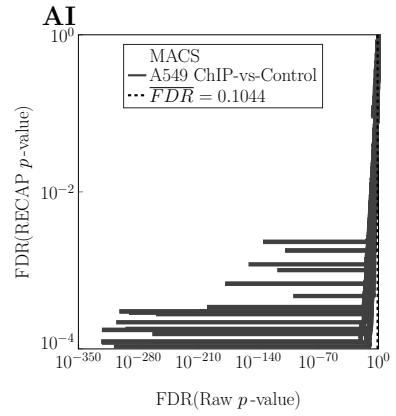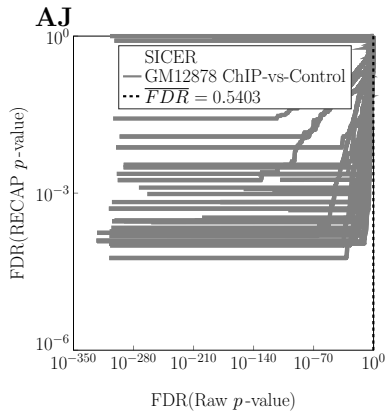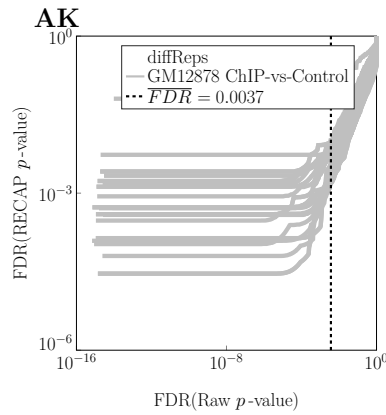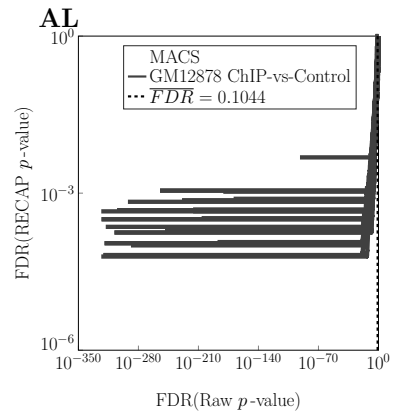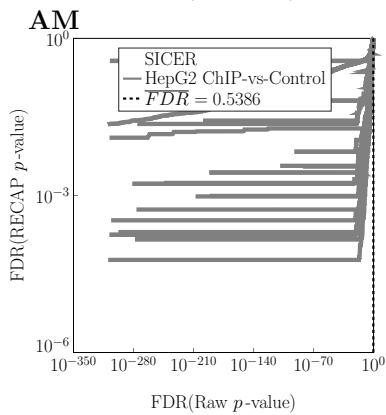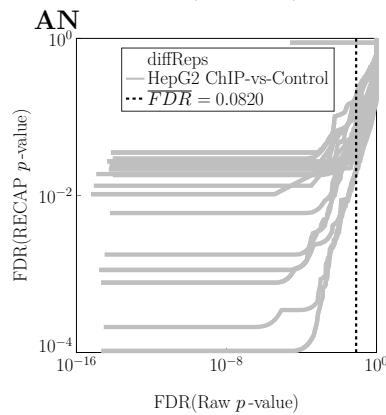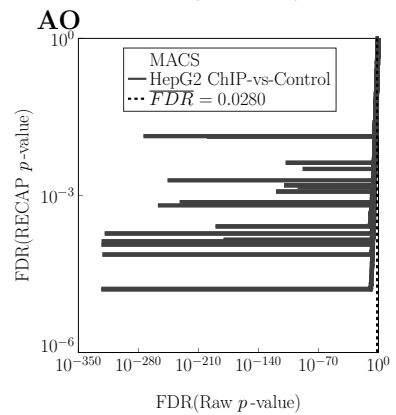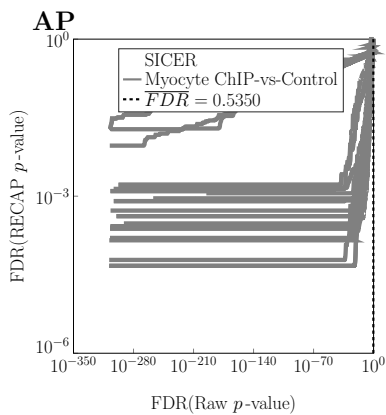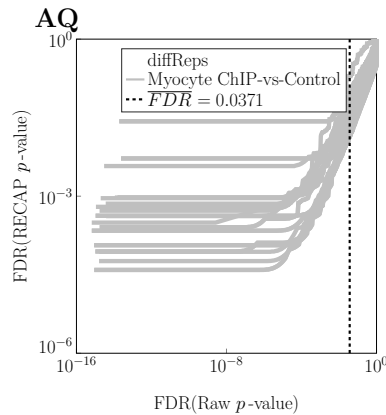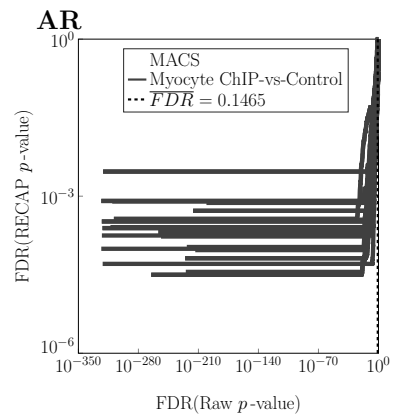

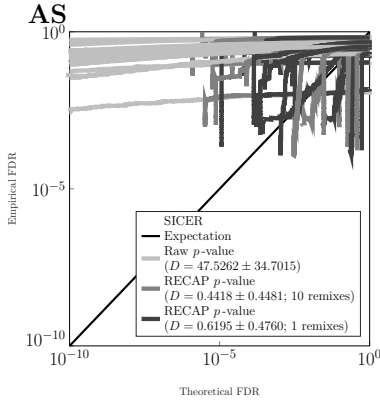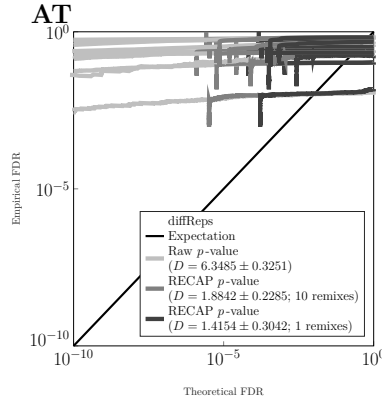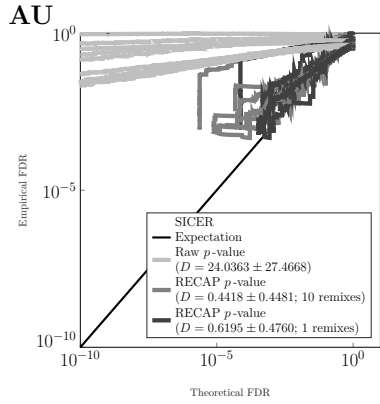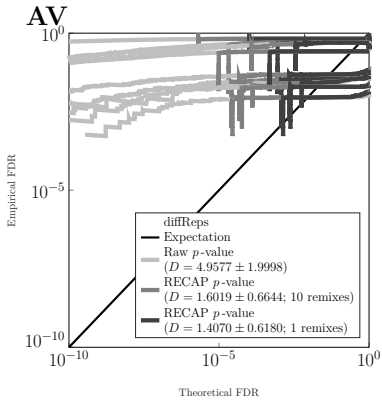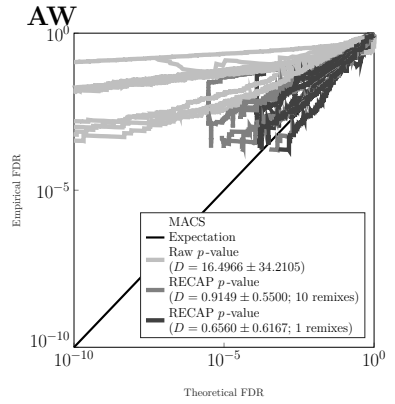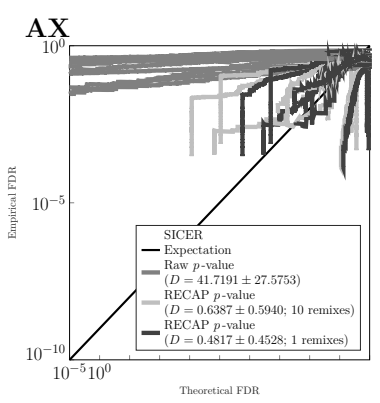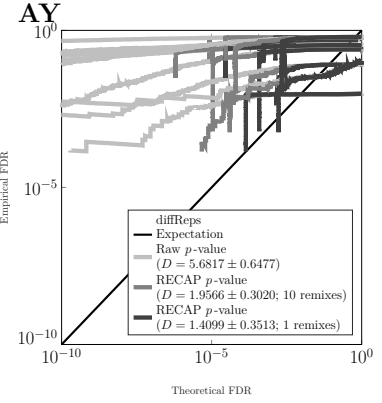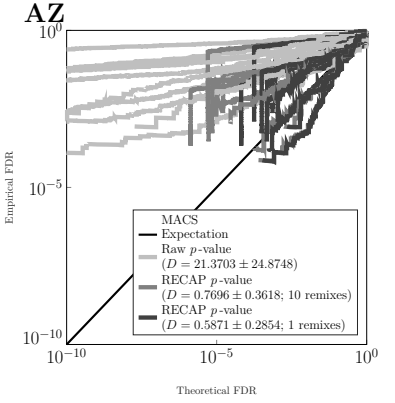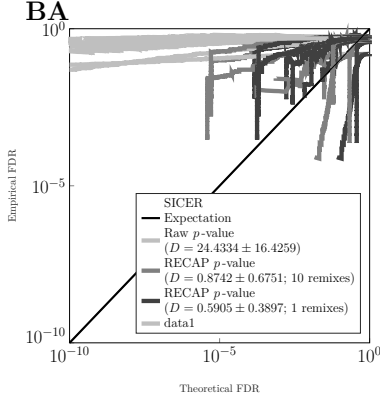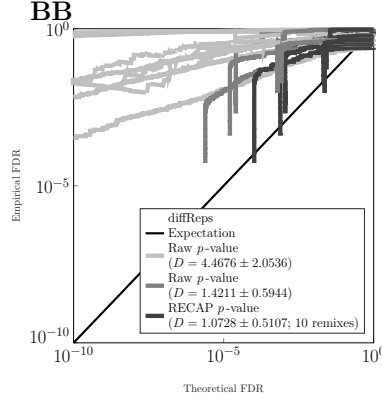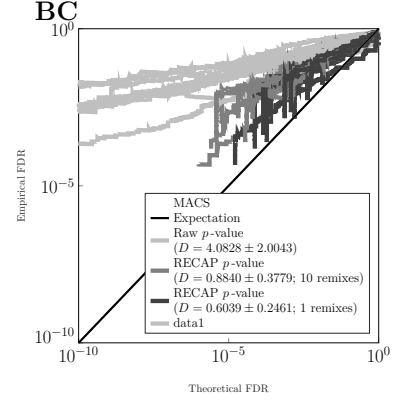

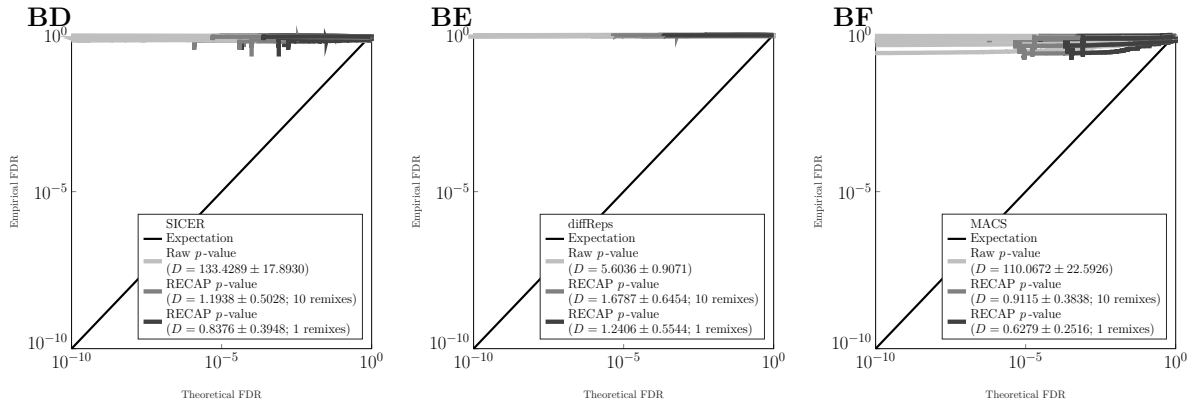

Figure S4: Empirical CDFs,  $p$ -values and theoretical and empirical FDRs for SICER, diffReps, and MACS for ENCODE ChIP-seq versus control peak calling.

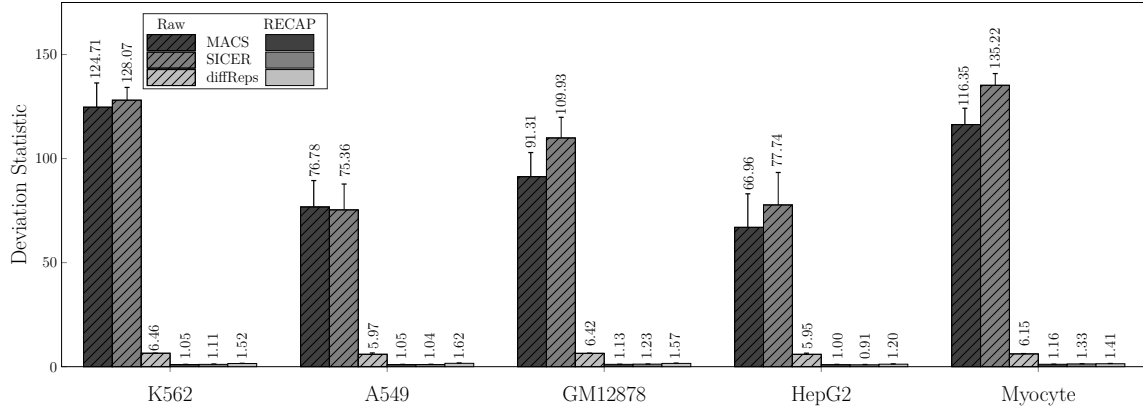

Figure S5: Reductions in deviation statistic for the RECAP recalibrated  $p$ -values for 10 pairs of ENCODE ChIP-seq versus control peak calling within 5 cell lines.
